# Supplementary material for: Resolution dependence of uncertainties in gridded emission inventories: a case study in Hebei, China
Source: Copernicus journal article supplement (doi:10.5194/acp-17-921-2017), 2017-01-20
Supplement: Supplementary file 1 [file acp-17-921-2017-supplement.pdf]

Supplement of Atmos. Chem. Phys., 17, 921–933, 2017  
<http://www.atmos-chem-phys.net/17/921/2017/>  
doi:10.5194/acp-17-921-2017-supplement  
© Author(s) 2017. CC Attribution 3.0 License.

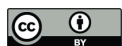

Atmospheric  
Chemistry  
and Physics  
Open Access  
EGU

*Supplement of*

## **Resolution dependence of uncertainties in gridded emission inventories: a case study in Hebei, China**

**Bo Zheng et al.**

*Correspondence to:* Qiang Zhang (qiangzhang@tsinghua.edu.cn) and Kebin He (hekb@tsinghua.edu.cn)

The copyright of individual parts of the supplement might differ from the CC-BY 3.0 licence.

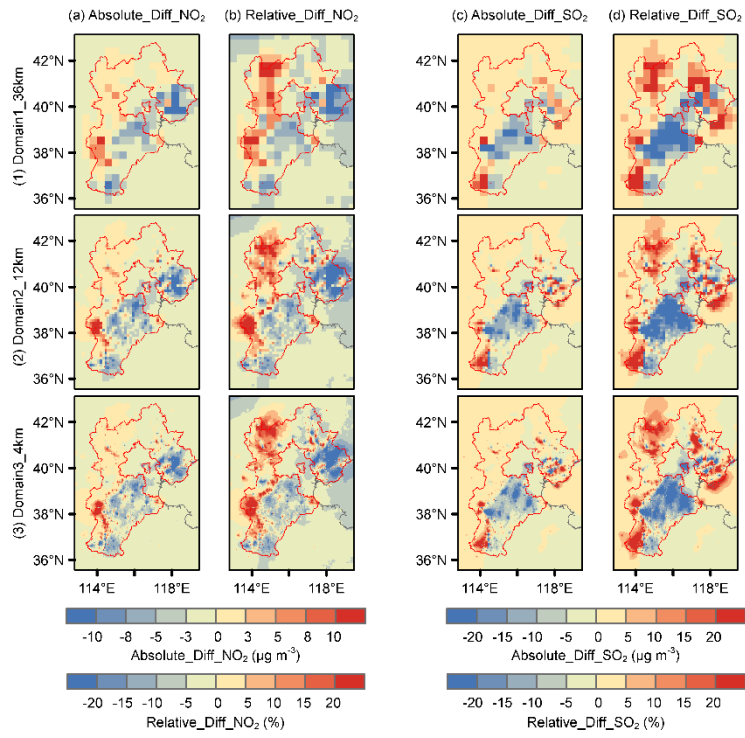

Figure S1 Comparative SO<sub>2</sub> and NO<sub>2</sub> maps modeled using S1 and S2 (S1 subtracted from S2)

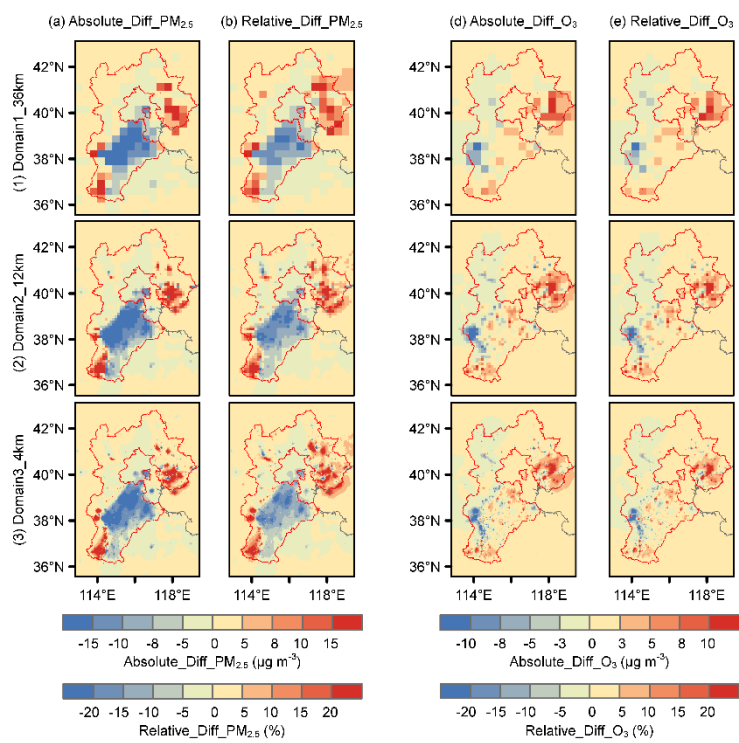

Figure S2 Comparative PM<sub>2.5</sub> and O<sub>3</sub> maps modeled using S1 and S2 (S1 subtracted from S2)
